# Supplementary material for: Facile synthesis of an ultramicroporous MOF tubular membrane with selectivity towards CO2
Source: Royal Society of Chemistry journal article supplement (doi:10.1039/c0nj00667j), 2010-10-28
Supplement: c0nj00667j.pdf [file c0nj00667j.pdf]

## **Facile Synthesis of an Ultramicroporous MOF Tubular**

### **Membrane with Selectivity towards CO<sub>2</sub>**

Sonia Aguado, Charles-Henri Nicolas, Virginie Moizan-Baslé, Carlos Nieto,

Hedi Amrouche, Nicolas Bats, Nathalie Audebrand and David Farrusseng\*

### **Supporting Information**

## 1.- Synthesis and characterization of SIM-1

### Synthesis of SIM-1 powder

In a typical synthesis a solid mixture of 0.71 g (2.73 mmol) of  $\text{Zn}(\text{NO}_3)_2 \cdot 4\text{H}_2\text{O}$  and 1.20 g (10.94 mmol) of 4-methyl-5-imidazolecarboxaldehyde is dissolved in 20 ml of DMF. Afterwards the solution is poured into a vial and heated in an oven at 358 K for 72 h. After the synthesis, the resulting powder is washed 3 times with DMF then with EtOH. The samples are dried at 358K for 3h and then overnight under vacuum at room temperature.

### Characterization of SIM-1 powder

#### - Elemental analysis

Elemental analysis was carried out by Inductively Coupled Plasma ICP (Activa Horiba) after dissolution of the samples.

Elem. anal. calcd for  $[\text{C}_{10}\text{H}_{10}\text{N}_4\text{O}_2\text{Zn}]$ : C, 42.35; H, 3.55; N, 19.76; Zn, 23.06, found C, 42.29; H, 3.61; N, 19.71; Zn, 23.01.

#### - Liquid $^1\text{H}$ NMR

The  $^1\text{H}$  NMR spectrum was recorded on a Brücker 250 MHz spectrometer at room temperature.

In a NMR tube, around 3mg of **SIM-1** were dissolved with a minimum of  $\text{DCl}/\text{D}_2\text{O}$  solution and then diluted in  $\text{DMSO-d}_6$  (c.a. 400 $\mu\text{L}$ ).  $^1\text{H}$  NMR  $\delta$  (250 MHz,  $\text{DMSO-d}_6$ , 294K) = 2.51 (s, 3H,  $\text{CH}_3$ ), 8.81 (s, 1H, CH), 9.75 (s, 1H, CHO) ppm. Pics at 4.85 and 2.50 ppm correspond respectively to water ( $\text{H}_2\text{O}$ ) and DMSO from the NMR solvent. No signal from DMF can be detected by NMR, thus showing the efficiency of the washing procedure.

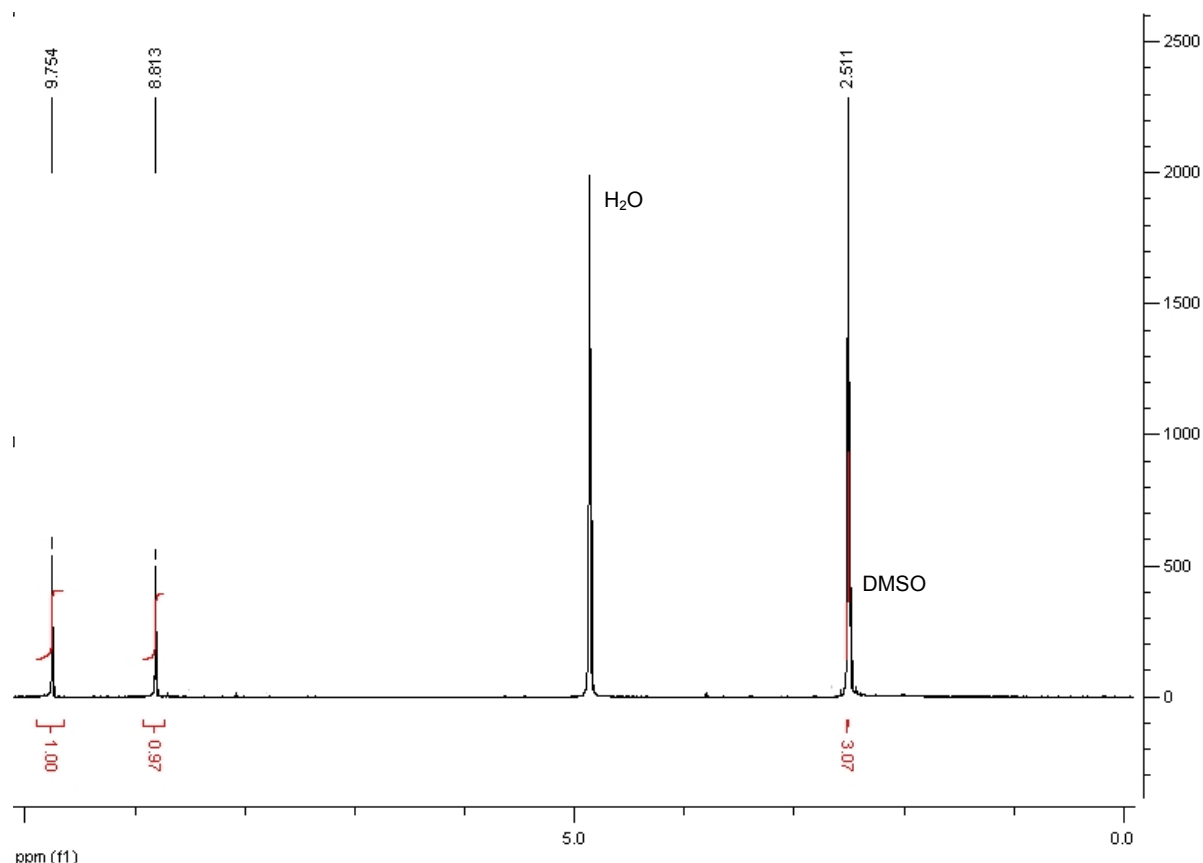

Figure S1:  $^1\text{H}$  NMR of SIM-1.

## 2.- X-ray diffraction (XRD)

For indexing, high-quality powder diffraction data was obtained at room temperature employing a Panalytical X'Pert Pro diffractometer with Debye-Scherrer geometry. The pattern was scanned in the range  $2\theta = 5-100^\circ$  with a step length of  $0.008^\circ(2\theta)$  and a counting time of 2000 s per step. The X'Pert Pro system is equipped with a hybrid monochromator (combination of a parabolic multilayer mirror and a 2-crystal Ge(220) monochromator) producing a monochromatic Cu  $K\alpha_1$  radiation ( $\lambda = 1.5406 \text{ \AA}$ ), and a position sensitive detector (X'Celerator). Pattern indexing was performed with the program DICVOL91 [1] he Accelrys software suite, Materials Studio 5.0.

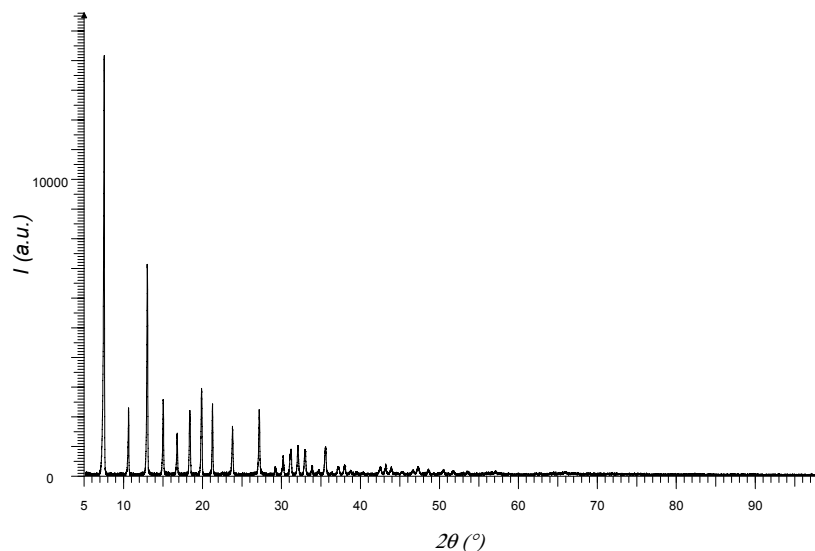

**Figure S2:** XRD pattern of SIM-1 powder.

For phase identification, XRD measurements were carried out at room temperature by powder X-Ray diffraction using a Bruker D5005 Diffractometer equipped with a secondary graphite monochromator (Cu  $K\alpha$  radiation,  $\lambda = 1.5418 \text{ \AA}$ ) and a scintillation counter. The pattern was scanned in the range  $2\theta = 5-50^\circ$  with a step length of  $0.02^\circ(2\theta)$  and a counting time of 756 s per step.

[1] A. Boultif, D.J. Louër, *Appl. Crystallogr.* **1991**, *24*, 987.

## 3.- Structural analysis

The surface and cross-section morphology of the as-synthesized supported samples were examined by scanning electron microscopy (SEM) using a JSM 5800LV (JEOL), coupled to an analysis system by energy dispersion spectrometry (EDS) with a diode Si-Li (PGT). The tension range is 0.3-30 kV and the effective resolution is 0.5 nm at 30kV.

#### 4.- TGA

The thermogravimetric analysis (TGA) was measured on a SETARAM (Setsys Evolution)TGA-DSC instrument, coupled with a mass spectrometer PFEIFFER (Omnistar) . For this purpose, ca.10 mg of sample were filled into alumina crucibles and heated in a flow of Ar ( $50 \text{ ml}\cdot\text{min}^{-1}$ ) with a ramp of  $5 \text{ K}\cdot\text{min}^{-1}$  from room temperature up to 973 K.

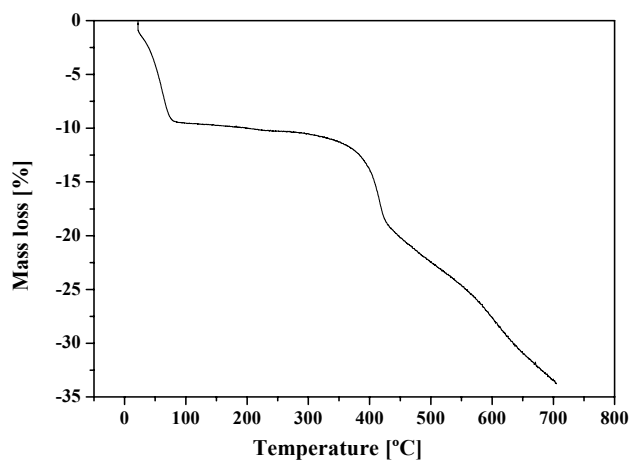

Figure S3: TG curve of SIM-1 powder.

#### 5.- Gas sorption analysis

The  $\text{N}_2$  adsorption/desorption isotherms at 77 K were measured on a BELSORP-MAX. The sample was outgassed under vacuum ( $\sim 10^{-4}$  mbar) at 473K for 12 h before start of the measurements. The apparent specific surface area obtained by applying the BET method is  $471 \text{ m}^2\cdot\text{g}^{-1}$ .

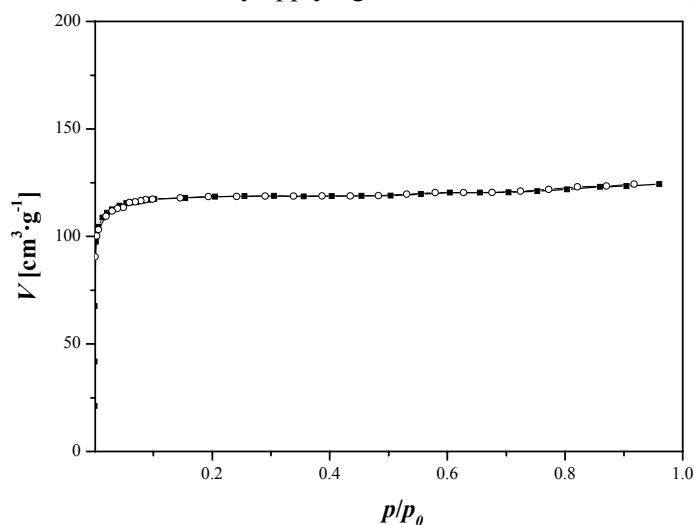

Figure S4:  $\text{N}_2$  isotherm (77 K) of SIM-1. Close squares, adsorption. Open circles, desorption.

The  $\text{CO}_2$  and  $\text{N}_2$  adsorption/desorption isotherms at 303 K were measured on a BELSORP-HP. The sample was outgassed under vacuum ( $\sim 10^{-4}$  mbar) at 473K for 12 h before start of the measurements.

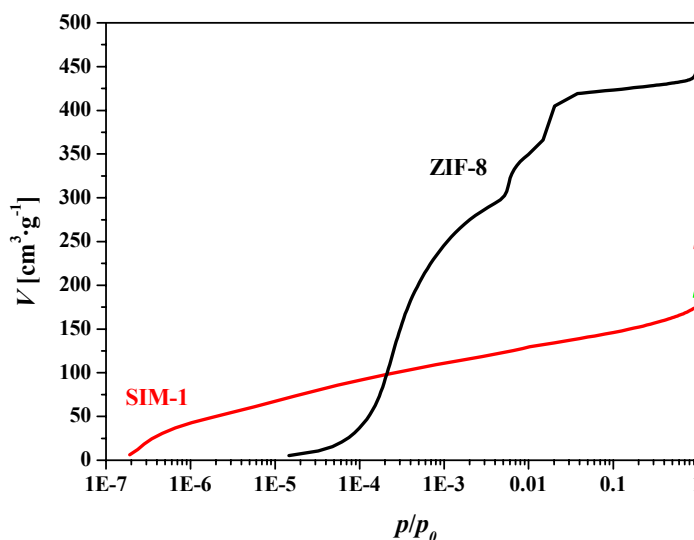

**Figure S5:** N<sub>2</sub> isotherm (77 K) of SIM-1 and ZIF-8, represented as linear-log diagrams.

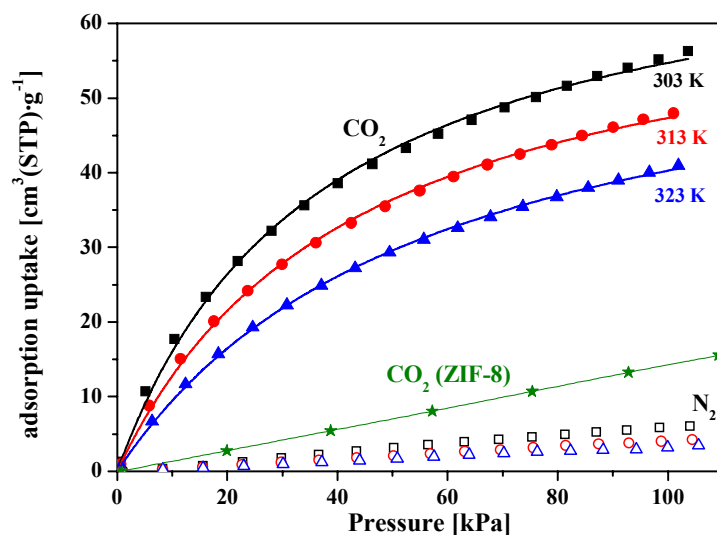

**Figure S6:** CO<sub>2</sub> and N<sub>2</sub> adsorption isotherms of SIM-1 at 303-323 K compared with ZIF-8 (CO<sub>2</sub> at 303 K). Black symbols, 303 K; red symbols, 313 K and blue symbols, 323 K.

The adsorption isotherm for ZIF-8 corresponds to previous reported results from other groups in which a linear profile is observed at low pressure. [2,3]

[2] A. Yazaydin, R. Q. Snurr, T.-H. Park, K. Koh, J. Liu, M. D. LeVan, A. I. Benin, P. Jakubczak, M. Lanuza, D. B. Galloway, J. J. Low, R. R. Willis, *J. Am. Chem. Soc.* **2009**, *131*, 18198.

[3] S. Reyes, J. Santiesteban, Z. Ni, C. Paur, P. Kortunov, J. Zengel, H. Deckman, US Patent US 2009/0214407, **2009**.

For single gas permeation, the membranes were mounted in dead-end configuration module using flat gaskets pressed onto the enameled tube ending cross-section. Permeances were measured in dead-end configuration varying transmembrane pressure from 0.5 to 3 bar, and temperatures from room temperature to 120 °C to evaluate the presence of defects or cracks.

**Table S7:** N<sub>2</sub> permeance of several membranes at 298 K and ΔP=100kPa

|    | N <sub>2</sub> permeance [mol·s <sup>-1</sup> ·m <sup>-2</sup> ·Pa <sup>-1</sup> ] |                       |
|----|------------------------------------------------------------------------------------|-----------------------|
|    | before EtOH washing                                                                | after EtOH washing    |
| M1 | 0                                                                                  | 1.68·10 <sup>-8</sup> |
| M2 | 0                                                                                  | 2.12·10 <sup>-8</sup> |
| M3 | 0                                                                                  | 2.56·10 <sup>-8</sup> |

## 7.- Binary permeation

For the mixed gas measurements feed was constant with a total volumetric flow rate of 300 ml min<sup>-1</sup> with a composition 10 vol.% of CO<sub>2</sub> and 87 vol.% of N<sub>2</sub>, with a 3 vol.% of water. The pressure in the feed was constant at 4 bar, and the pressure difference with the permeate side was 40 mbar. The measurements were made at room temperature (324 K).
